# Supplementary material
Source: publisher figshare collection journal article supplement (https://diabetesjournals.figshare.com/ndownloader/files/31037032)
Supplement: Supplementary file 1 [file 31037032]

## Online-Only Supplemental Material

**Tabel S1.** Covariates included in multivariable analyses

| Covariate               | Unit              | Definition                                                                                                                           | Source | Categories                                                                               |
|-------------------------|-------------------|--------------------------------------------------------------------------------------------------------------------------------------|--------|------------------------------------------------------------------------------------------|
| Sex                     |                   |                                                                                                                                      | NDR    | Female                                                                                   |
|                         |                   |                                                                                                                                      |        | Male                                                                                     |
| Age                     | Years             |                                                                                                                                      | NDR    | Age<55years                                                                              |
|                         |                   |                                                                                                                                      |        | 55≤Age<65                                                                                |
|                         |                   |                                                                                                                                      |        | 65≤Age<75                                                                                |
|                         |                   |                                                                                                                                      |        | Age≥75 years                                                                             |
| Diabetes treatment      |                   |                                                                                                                                      | NDR    | Diet only                                                                                |
|                         |                   |                                                                                                                                      |        | Non-insulin glucose lowering drugs only (tablets and/or GLP-1 analogues)                 |
|                         |                   |                                                                                                                                      |        | Insulin only                                                                             |
|                         |                   |                                                                                                                                      |        | Insulin and non-insulin glucose lowering drugs (tablets and/or GLP-1 analogues)          |
| BMI                     | kg/m <sup>2</sup> | BMI closest to sepsis diagnosis                                                                                                      | NDR    | Underweight: BMI <18.5                                                                   |
|                         |                   |                                                                                                                                      |        | Normal: BMI 18.5-24.9                                                                    |
|                         |                   |                                                                                                                                      |        | Overweight: BMI 25-29.9                                                                  |
|                         |                   |                                                                                                                                      |        | Obese: BMI ≥30                                                                           |
| Time-updated mean HbA1c | mmol/mol (%)      | Mean value from all HbA1c taken last 12 months before first sepsis diagnosis                                                         | NDR    | <43 mmol/mol (6.1%)                                                                      |
|                         |                   |                                                                                                                                      |        | 43-47 mmol/mol (6.1-6.5%)                                                                |
|                         |                   |                                                                                                                                      |        | 48-52 mmol/mol (6.5-6.9%)                                                                |
|                         |                   |                                                                                                                                      |        | 53-62 mmol/mol (7.0-7.8%)                                                                |
|                         |                   |                                                                                                                                      |        | 63-72 mmol/mol (7.9-8.7%)                                                                |
|                         |                   |                                                                                                                                      |        | 73-82 mmol/mol (8.8-9.7%)                                                                |
|                         |                   |                                                                                                                                      |        | >82 mmol/mol (9.7%)                                                                      |
| Blood pressure interval | mmHg              | Systolic blood pressure (SBP) and diastolic blood pressure (DBP) closest to sepsis diagnosis but max 3 years before sepsis diagnosis | NDR    | <b>Normal:</b> SBP 120-129 mmHg and/or DBP 80-84 mmHg and SBP <120 mmHg and DBP <80 mmHg |
|                         |                   |                                                                                                                                      |        | <b>High normal:</b> SBP 130-139 mmHg and/or DBP 85-89 mmHg                               |
|                         |                   |                                                                                                                                      |        | <b>Hypertension:</b> SBP ≥140 mmHg and/or DBP ≥90 mmHg                                   |
| eGFR                    | ml/min            | Value closest to sepsis diagnosis but max 3 years before sepsis diagnosis                                                            | NDR    | ≥ 90 ml/min                                                                              |
|                         |                   |                                                                                                                                      |        | 60-89 ml/min                                                                             |
|                         |                   |                                                                                                                                      |        | 45-59 ml/min                                                                             |
|                         |                   |                                                                                                                                      |        | 30-44 ml/min                                                                             |
|                         |                   |                                                                                                                                      |        | 15-29 ml/min                                                                             |
|                         |                   |                                                                                                                                      |        | <15 ml/min                                                                               |

|                                   |  |                                                                                                                                                                                                                   |                          |                                                                                               |
|-----------------------------------|--|-------------------------------------------------------------------------------------------------------------------------------------------------------------------------------------------------------------------|--------------------------|-----------------------------------------------------------------------------------------------|
| Albuminuria                       |  | Value closest to sepsis diagnosis, but max 3 years before sepsis diagnosis                                                                                                                                        | NDR                      | Albuminuria categories in CKD AER ACR (approximate equivalent):                               |
|                                   |  |                                                                                                                                                                                                                   |                          | A1-Normal: AER<30 mg/24 hours (ACR<3 mg/mmol or <30mg/g)                                      |
|                                   |  |                                                                                                                                                                                                                   |                          | A2-Moderately increased: AER 30-300 mg/24h (ACR 3-30mg/mmol or 30-300mg/g) (Microalbuminuria) |
|                                   |  |                                                                                                                                                                                                                   |                          | A3-Severely increased: (Macroalbuminuria) AER>300mg/24h (ACR>30mg/mmol or >300mg/g)           |
| Smoking status                    |  | Last recorded status before sepsis diagnosis                                                                                                                                                                      | NDR                      | Smoker                                                                                        |
|                                   |  |                                                                                                                                                                                                                   |                          | Non-smoker                                                                                    |
| Systemic corticosteroid treatment |  | ATC code up to 4 weeks before sepsis defined as a prescription for any of the listed drugs that was filled within the 4 weeks preceding sepsis diagnosis (sepsis group) or an NDR registration (no sepsis group). | Prescribed Drug Register | Defined using the following ATC codes:                                                        |
|                                   |  |                                                                                                                                                                                                                   |                          | H02AB: Glucocorticoids for systemic use                                                       |
|                                   |  |                                                                                                                                                                                                                   |                          | H02BX01: Glucocorticoids for systemic use, combinations                                       |
| Statin use                        |  | ATC code up to 3 years before sepsis defined as a prescription for any of the listed drugs that was filled within the 3 years preceding sepsis diagnosis (sepsis group) or an NDR registration (no sepsis group). | Prescribed Drug Register | Defined using the following ATC codes:                                                        |
|                                   |  |                                                                                                                                                                                                                   |                          | C10AA: HMG CoA reductase inhibitors                                                           |
|                                   |  |                                                                                                                                                                                                                   |                          | C10BA: HMG CoA reductase inhibitors in combination with other lipid modifying agents          |
|                                   |  |                                                                                                                                                                                                                   |                          | C10BX: HMG CoA reductase inhibitors, other combinations)                                      |

|                               |  |                                                                                                                                                                                                                   |                          |                                                                                                                                                                                                                    |
|-------------------------------|--|-------------------------------------------------------------------------------------------------------------------------------------------------------------------------------------------------------------------|--------------------------|--------------------------------------------------------------------------------------------------------------------------------------------------------------------------------------------------------------------|
| Other immunosuppressive drugs |  | ATC code up to 4 weeks before sepsis defined as a prescription for any of the listed drugs that was filled within the 4 weeks preceding sepsis diagnosis (sepsis group) or an NDR registration (no sepsis group). | Prescribed Drug Register | Defined using the following ATC codes:                                                                                                                                                                             |
|                               |  |                                                                                                                                                                                                                   |                          | L04AA Selective immunosuppressants                                                                                                                                                                                 |
|                               |  |                                                                                                                                                                                                                   |                          | L04AB Tumor necrosis factor alpha (TNF- $\alpha$ ) inhibitors                                                                                                                                                      |
|                               |  |                                                                                                                                                                                                                   |                          | L04AC Interleukin inhibitors                                                                                                                                                                                       |
|                               |  |                                                                                                                                                                                                                   |                          | L04AD Calcineurin inhibitors                                                                                                                                                                                       |
|                               |  |                                                                                                                                                                                                                   |                          | L04AX Other immunosuppressants: L04AX01 Azathioprine, L04AX02 Thalidomide, L04AX03 Methotrexate, L04AX04 Lenalidomide, L04AX05 Pirfenidone, L04AX06 Pomalidomide, L04AX07 Dimethyl fumarate, L04AX08 Darvadstrocel |
| Antihypertensive drugs        |  | ATC code up to 4 weeks before sepsis defined as a prescription for any of the listed drugs that was filled within the 4 weeks preceding sepsis diagnosis (sepsis group) or an NDR registration (no sepsis group). | Prescribed Drug Register | Defined using the following ATC codes:                                                                                                                                                                             |
|                               |  |                                                                                                                                                                                                                   |                          | C02: Antihypertensive agents                                                                                                                                                                                       |
|                               |  |                                                                                                                                                                                                                   |                          | C03: Diuretics                                                                                                                                                                                                     |
|                               |  |                                                                                                                                                                                                                   |                          | C08: Calcium channel blockers                                                                                                                                                                                      |
|                               |  |                                                                                                                                                                                                                   |                          | C07: Beta blocking agents                                                                                                                                                                                          |
|                               |  |                                                                                                                                                                                                                   |                          | C09A: ACE inhibitors, plain                                                                                                                                                                                        |
|                               |  |                                                                                                                                                                                                                   |                          | C09B: ACE inhibitors combinations                                                                                                                                                                                  |
|                               |  |                                                                                                                                                                                                                   |                          | C09C: Angiotensin II Receptor Blockers, plain                                                                                                                                                                      |
|                               |  |                                                                                                                                                                                                                   |                          | C09D: Angiotensin II Receptor Blockers, combinations                                                                                                                                                               |
| Recent antibiotic therapy     |  | ATC code up to 4 weeks before sepsis defined as a prescription for any of the listed drugs that was filled within the 4 weeks preceding sepsis diagnosis (sepsis group) or an                                     | Prescribed Drug Register | Defined using the following ATC codes:                                                                                                                                                                             |

|                      |  |                                     |                  |                                                       |
|----------------------|--|-------------------------------------|------------------|-------------------------------------------------------|
|                      |  | NDR registration (no sepsis group). |                  |                                                       |
|                      |  |                                     |                  | J01: Antibacterials for systemic use                  |
|                      |  |                                     |                  | J02: Antimycotics for systemic use                    |
|                      |  |                                     |                  | J04: Antimycobacterials                               |
| Coexisting condition |  | ICD-10                              | Patient Register | Defined using the following ICD-10 codes:             |
|                      |  |                                     |                  | Stroke: I61, I62.9, I63, I64, I67.9                   |
|                      |  |                                     |                  | Coronary heart disease: I20-I25                       |
|                      |  |                                     |                  | Heart failure: I50                                    |
|                      |  |                                     |                  | Atrial fibrillation: I48                              |
|                      |  |                                     |                  | Cancer: C00-C97                                       |
|                      |  |                                     |                  | Renal dialysis and transplantation: Z94.0, Z49, Z99.2 |
|                      |  |                                     |                  | Lung disease: J40-J47, J60-J70, J85-J86               |
|                      |  |                                     |                  | Liver disease: K70-K77                                |
|                      |  |                                     |                  | Hematologic disease: D50-D53, D60-D64, D70            |
|                      |  |                                     |                  | Immunologic deficiency: D80-D89                       |
| Income level         |  |                                     | LISA             | Low                                                   |
|                      |  |                                     |                  | Intermediate                                          |
|                      |  |                                     |                  | High                                                  |
| Country of birth     |  |                                     | LISA             | Sweden                                                |
|                      |  |                                     |                  | Other                                                 |
| Education level      |  | Education level at sepsis diagnosis | LISA             | Low: Primary and secondary school (up to 9 years)     |
|                      |  |                                     |                  | Intermediate: Upper Secondary School                  |
|                      |  |                                     |                  | High: Post-secondary Education and Doctoral Studies   |

**Abbreviations:** NDR, National Diabetes Register; BMI, Body Mass Index; HbA1c, glycated hemoglobin A1c; SBP, systolic blood pressure; DBP, diastolic blood pressure; GFR, glomerular filtration rate; AER, albumin excretion rate; ACR, albumin-to-creatinine ratio; ATC, Anatomical Therapeutic Chemical Classification System; ACE inhibitors, Angiotensin converting enzyme inhibitors; ICD, International Classification of Disease; LISA, Longitudinal integrated database for health insurance and labour market studies

**Table S2.** Baseline characteristics of type 2 diabetes individuals with and without sepsis

| Characteristic | Sepsis(N = 14,534)    | No sepsis(N = 488,337)  |
|----------------|-----------------------|-------------------------|
| Male sex       | 8,925/14,534 (61.4%)  | 277,375/488,337 (56.8%) |
| Age, years     | 71 (64 – 78)          | 65 (57 – 74)            |
| Age interval   |                       |                         |
| <55 years      | 968/14,534 (6.6%)     | 96,606/488,337 (19.8%)  |
| 55-64 years    | 3,080/14,534 (21.2%)  | 135,979/488,337 (27.8%) |
| 65-74 years    | 5,105/14,534 (35.1%)  | 145,866/488,337 (29.9%) |
| ≥75 years      | 5,381/14,534 (37.0%)  | 109,886/488,337 (22.5%) |
| Born in Sweden | 12,541/14,421 (86.9%) | 392,841/486,623 (80.7%) |

|                                                |                       |                         |
|------------------------------------------------|-----------------------|-------------------------|
| Smoker                                         | 2,101/14,165 (14.8%)  | 72,888/479,965 (15.2%)  |
| Education level                                |                       |                         |
| Low                                            | 6,995/13,748 (50.9%)  | 192,585/474,944 (40.5%) |
| Intermediate                                   | 5,037/13,748 (36.6%)  | 199,725/474,944 (42.1%) |
| High                                           | 1,716/13,748 (12.5%)  | 82,634/474,944 (17.4%)  |
| Income level                                   |                       |                         |
| Low                                            | 5,801/14,003 (41.4%)  | 166,121/483,369 (34.4%) |
| Intermediate                                   | 5,470/14,003 (39.1%)  | 164,581/483,369 (34.0%) |
| High                                           | 2,732/14,003 (19.5%)  | 152,667/483,369 (31.6%) |
| Diabetes duration, years*                      | 6 (1 – 12)            | 2 (0 – 8)               |
| Diabetes treatment                             |                       |                         |
| Diet only                                      | 3,640/14,222 (25.6%)  | 166,766/486,140 (34.3%) |
| Non-insulin glucose lowering drugs             | 5,347/14,222 (37.6%)  | 217,793/486,140 (44.8%) |
| Insulin only                                   | 2,837/14,222 (19.9%)  | 49,502/486,140 (10.2%)  |
| Insulin and non-insulin glucose lowering drugs | 2,398/14,222 (16.9%)  | 52,079/486,140 (10.7%)  |
| Body mass index, kg/m <sup>2</sup>             | 29.1 (26.0 – 33.0)    | 29.2 (26.2 – 32.9)      |
| Body mass index interval                       |                       |                         |
| Underweight                                    | 81/13,410 (0.6%)      | 1,584/466,436 (0.3%)    |
| Normal                                         | 2,324/13,410 (17.3%)  | 74,026/466,436 (15.9%)  |
| Overweight                                     | 5,098/13,410 (38.0%)  | 183,617/466,436 (39.4%) |
| Obese                                          | 5,907/13,410 (44.0%)  | 207,209/466,436 (44.4%) |
| Glycated hemoglobin A1c, mmol/mol              | 52 (45 – 62)          | 50 (45 – 59)            |
| Glycated hemoglobin A1c interval               |                       |                         |
| <43 mmol/mol (<6.1%)                           | 2,108/14,283 (14.8%)  | 81,845/484,905 (16.9%)  |
| 43-47 mmol/mol (6.1-6.5%)                      | 2,568/14,283 (18.0%)  | 100,405/484,905 (20.7%) |
| 48-52 mmol/mol (6.5-6.9%)                      | 2,598/14,283 (18.2%)  | 95,978/484,905 (19.8%)  |
| 53-62 mmol/mol (7-7.8%)                        | 3,450/14,283 (24.2%)  | 104,265/484,905 (21.5%) |
| 63-72 mmol/mol (7.9-8.7%)                      | 1,856/14,283 (13.0%)  | 53,615/484,905 (11.1%)  |
| 73-82 mmol/mol (8.8-9.7%)                      | 1,015/14,283 (7.1%)   | 26,851/484,905 (5.5%)   |
| >82 mmol/mol (>9.7%)                           | 688/14,283 (4.8%)     | 21,946/484,905 (4.5%)   |
| Diastolic blood pressure, mmHg†                | 79 (70 – 80)          | 80 (70 – 85)            |
| Systolic blood pressure, mmHg‡                 | 140 (128 – 150)       | 138 (126 – 150)         |
| Blood pressure interval                        |                       |                         |
| Normal                                         | 3,395/14,154 (24.0%)  | 120,625/483,176 (25.0%) |
| High normal                                    | 3,062/14,154 (21.6%)  | 116,681/483,176 (24.1%) |
| Hypertension                                   | 7,697/14,154 (54.4%)  | 245,870/483,176 (50.9%) |
| eGFR, ml/min                                   | 71 (55 – 88)          | 81 (66 – 96)            |
| eGFR interval                                  |                       |                         |
| ≥90 ml/min                                     | 3,134/13,794 (22.7%)  | 159,611/475,462 (33.6%) |
| 60-89 ml/min                                   | 6,280/13,794 (45.5%)  | 235,643/475,462 (49.6%) |
| 45-59 ml/min                                   | 2,549/13,794 (18.5%)  | 55,670/475,462 (11.7%)  |
| 30-44 ml/min                                   | 1,335/13,794 (9.7%)   | 19,667/475,462 (4.1%)   |
| 15-29 ml/min                                   | 365/13,794 (2.6%)     | 4,223/475,462 (0.9%)    |
| <15 ml/min                                     | 131/13,794 (0.9%)     | 648/475,462 (0.1%)      |
| Albuminuria                                    |                       |                         |
| Normoalbuminuria                               | 10,967/14,534 (75.5%) | 421,193/488,337 (86.3%) |
| Microalbuminuria                               | 2,118/14,534 (14.6%)  | 45,377/488,337 (9.3%)   |
| Macroalbuminuria                               | 1,449/14,534 (10.0%)  | 21,767/488,337 (4.5%)   |
| Coexisting conditions                          |                       |                         |
| Stroke                                         | 452 (3.1%)            | 11,280 (2.3%)           |
| Coronary heart disease                         | 523 (3.6%)            | 24,066 (4.9%)           |
| Heart failure                                  | 418 (2.9%)            | 9,963 (2.0%)            |
| Atrial fibrillation                            | 319 (2.2%)            | 11,658 (2.4%)           |
| Cancer                                         | 398 (2.7%)            | 12,609 (2.6%)           |
| Renal dialysis and transplantation             | 30 (0.2%)             | 349 (0.1%)              |
| Lung disease                                   | 244 (1.7%)            | 8,484 (1.7%)            |
| Liver disease                                  | 69 (0.5%)             | 1,758 (0.4%)            |
| Hematologic disease                            | 393 (2.7%)            | 7,564 (1.5%)            |

|                                  |               |                 |
|----------------------------------|---------------|-----------------|
| Immunologic deficiency           | 8 (0.06%)     | 335 (0.07%)     |
| Medications                      |               |                 |
| Recent antibiotic therapy        | 927 (6.4%)    | 20,248 (4.1%)   |
| Corticosteroids                  | 491 (3.4%)    | 7,210 (1.5%)    |
| Immunosuppressants               | 162 (1.1%)    | 2,390 (0.5%)    |
| Statin                           | 5,629 (38.7%) | 198,195 (40.6%) |
| Antihypertensive drugs           | 9,672 (66.5%) | 307,382 (62.9%) |
| Beta blockers                    | 6,199 (42.7%) | 179,188 (36.7%) |
| ACE inhibitors                   | 4,798 (33.0%) | 152,035 (31.1%) |
| Angiotensin II receptor blockers | 2,853 (19.6%) | 95,619 (19.6%)  |
| Others                           | 7,197 (49.5%) | 200,839 (41.1%) |

Data are number/total number (%) or median (IQR). eGFR, estimated glomerular filtration rate. Educational level was categorized as low (compulsory only), intermediate, or high (university level or similar). \*Data available in 14,492 persons in the sepsis group and 487,771 persons in the no sepsis group. †Data available in 14,131 persons in the sepsis group and 482,967 persons in the no sepsis group. ‡ Data available in 14,134 persons in the sepsis group and 483,077 persons in the no sepsis group

**Table S3.** Cox regression analysis showing the association with sepsis in individuals with type 2 diabetes using five different approaches to quantify HbA1c

|                                                                                                                                                                                                                                                                                                                                                                                                                                                                                                                                                                                                                                                                                                                                                                                                                                                   | Updated mean HbA1c (12 months) <sup>a</sup> | Baseline HbA1c <sup>b</sup> | Updated mean HbA1c (all values) <sup>c</sup> | Updated time-weighted mean HbA1c (all values) <sup>d</sup> | Latest updated HbA1c <sup>e</sup> |
|---------------------------------------------------------------------------------------------------------------------------------------------------------------------------------------------------------------------------------------------------------------------------------------------------------------------------------------------------------------------------------------------------------------------------------------------------------------------------------------------------------------------------------------------------------------------------------------------------------------------------------------------------------------------------------------------------------------------------------------------------------------------------------------------------------------------------------------------------|---------------------------------------------|-----------------------------|----------------------------------------------|------------------------------------------------------------|-----------------------------------|
| Variable                                                                                                                                                                                                                                                                                                                                                                                                                                                                                                                                                                                                                                                                                                                                                                                                                                          | HR (95% CI) <sup>f</sup>                    | HR (95% CI) <sup>f</sup>    | HR (95% CI) <sup>f</sup>                     | HR (95% CI) <sup>f</sup>                                   | HR (95% CI) <sup>f</sup>          |
| HbA1c interval, mmol/mol                                                                                                                                                                                                                                                                                                                                                                                                                                                                                                                                                                                                                                                                                                                                                                                                                          |                                             |                             |                                              |                                                            |                                   |
| <43                                                                                                                                                                                                                                                                                                                                                                                                                                                                                                                                                                                                                                                                                                                                                                                                                                               | 1.15 (1.07-1.24)                            | 1.09 (1.02-1.17)            | 1.04 (0.96-1.12)                             | 1.14 (1.06-1.23)                                           | 1.12 (1.04-1.21)                  |
| 43-47                                                                                                                                                                                                                                                                                                                                                                                                                                                                                                                                                                                                                                                                                                                                                                                                                                             | 1.00 (0.93-1.07)                            | 1.02 (0.95-1.09)            | 0.96 (0.90-1.03)                             | 1.01 (0.94-1.08)                                           | 0.99 (0.92-1.06)                  |
| 48-52                                                                                                                                                                                                                                                                                                                                                                                                                                                                                                                                                                                                                                                                                                                                                                                                                                             | 1.00                                        | 1.00                        | 1.00                                         | 1.00                                                       | 1.00                              |
| 53-62                                                                                                                                                                                                                                                                                                                                                                                                                                                                                                                                                                                                                                                                                                                                                                                                                                             | 0.93 (0.87-0.99)                            | 1.06 (0.99-1.13)            | 1.01 (0.95-1.07)                             | 1.01 (0.95-1.07)                                           | 0.93 (0.88-0.99)                  |
| 63-72                                                                                                                                                                                                                                                                                                                                                                                                                                                                                                                                                                                                                                                                                                                                                                                                                                             | 1.05 (0.97-1.13)                            | 1.04 (0.96-1.12)            | 1.11 (1.04-1.20)                             | 1.12 (1.04-1.20)                                           | 1.07 (1.00-1.15)                  |
| 73-82                                                                                                                                                                                                                                                                                                                                                                                                                                                                                                                                                                                                                                                                                                                                                                                                                                             | 1.14 (1.04-1.25)                            | 1.28 (1.17-1.40)            | 1.41 (1.29-1.56)                             | 1.25 (1.14-1.37)                                           | 1.20 (1.09-1.31)                  |
| >82                                                                                                                                                                                                                                                                                                                                                                                                                                                                                                                                                                                                                                                                                                                                                                                                                                               | 1.52 (1.37-1.68)                            | 1.45 (1.31-1.61)            | 1.71 (1.47-1.99)                             | 1.65 (1.46-1.86)                                           | 1.51 (1.36-1.68)                  |
| <sup>a</sup> Updated mean HbA1c is the mean value of all HbA1c values recorded within 12 months before sepsis diagnosis<br><sup>b</sup> Baseline HbA1c is the first recorded value in the National Diabetes Register<br><sup>c</sup> Updated mean HbA1c is the mean of all values recorded in the National Diabetes Register until sepsis diagnosis<br><sup>d</sup> Updated time-weighted (TW) mean HbA1c is the time-weighted average of all values recorded in the National Diabetes Register until sepsis diagnosis<br><sup>e</sup> Latest updated HbA1c value before sepsis diagnosis<br><sup>f</sup> The analyses were adjusted for age, sex, smoking, country of birth, socioeconomic factors, diabetes treatment, other medications, body mass index, blood pressure, eGFR, albuminuria, and coexisting conditions (Supplemental Table S1) |                                             |                             |                                              |                                                            |                                   |

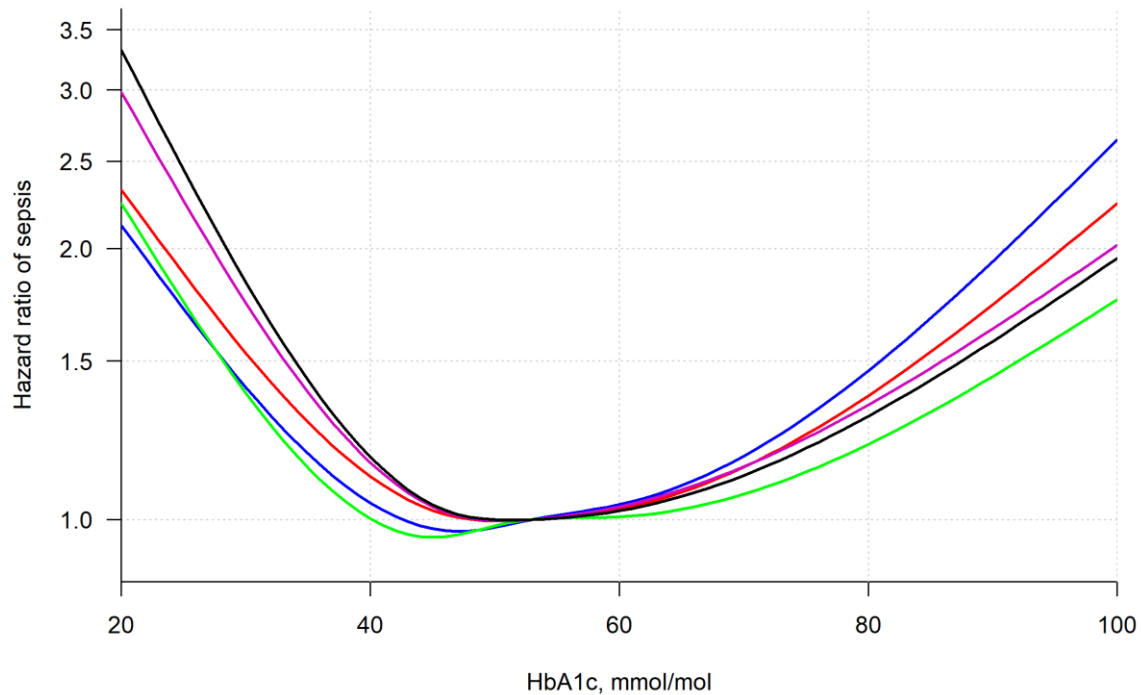

**Figure S1.** Adjusted restricted cubic spline curves showing the hazard ratio for sepsis risk by HbA1c level. HbA1c was assessed using five different approaches: as updated mean HbA1c using the mean value of all HbA1c values recorded within 12 months before sepsis diagnosis (black curve); as baseline HbA1c using the first recorded value in the National Diabetes Register (green curve); as updated mean HbA1c using all values recorded in the National Diabetes Register until sepsis diagnosis (blue curve); as updated time-weighted mean HbA1c from all values recorded in the National Diabetes Register until sepsis diagnosis (red curve); and as latest updated HbA1c value before sepsis diagnosis (purple curve). All hazard ratios are with respect to a reference HbA1c of 53 mmol/mol. The spline curves were adjusted for the confounders listed in the Supplemental Table S1.

**Table S4.** Cox regression analysis showing the association with sepsis in individuals with type 2 diabetes after excluding or censoring patients being immunosuppressed by disease or receiving immunosuppressive medication

|                          | Immunosuppressed individuals excluded <sup>a</sup> | Individuals censored at immunosuppression <sup>a</sup> |
|--------------------------|----------------------------------------------------|--------------------------------------------------------|
| Variable                 | HR (95% CI) <sup>b</sup>                           | HR (95% CI) <sup>b</sup>                               |
| HbA1c interval, mmol/mol |                                                    |                                                        |
| <43                      | 1.14 (1.05-1.24)                                   | 1.16 (1.06-1.26)                                       |
| 43-47                    | 0.99 (0.92-1.07)                                   | 0.99 (0.92-1.07)                                       |
| 48-52                    | 1.00                                               | 1.00                                                   |
| 53-62                    | 0.92 (0.86-0.99)                                   | 0.93 (0.86-1.00)                                       |
| 63-72                    | 1.03 (0.95-1.12)                                   | 1.04 (0.96-1.13)                                       |
| 73-82                    | 1.16 (1.04-1.28)                                   | 1.18 (1.06-1.30)                                       |
| >82                      | 1.54 (1.37-1.72)                                   | 1.57 (1.40-1.76)                                       |

<sup>a</sup>Immunosuppression was defined as cancer (ICD-10 codes C00-C97), renal dialysis and transplantation (ICD-10 codes Z94.0, Z49, and Z99.2), immunologic deficiency (ICD-10 codes D80-D89), and/or treatment with immunosuppressive drugs (ATC codes L04, H02AB, and H02BX01)

<sup>b</sup>The analyses were adjusted for age, sex, smoking, country of birth, socioeconomic factors, diabetes treatment, other medications, body mass index, blood pressure, eGFR, albuminuria, and coexisting conditions (Supplemental Table S1)

**Table S5.** Cox regression analysis showing the association between HbA1c and all-cause mortality in individuals with type 2 diabetes and sepsis

| Variable                                                                                                                                                                                                                                | Unadjusted HR (95% CI) | HR adjusted for age and sex (95% CI) | Fully adjusted* HR (95% CI) |
|-----------------------------------------------------------------------------------------------------------------------------------------------------------------------------------------------------------------------------------------|------------------------|--------------------------------------|-----------------------------|
| HbA1c interval                                                                                                                                                                                                                          |                        |                                      |                             |
| <43 mmol/mol                                                                                                                                                                                                                            | 1.07 (0.98-1.16)       | 1.11 (1.02-1.20)                     | 1.03 (0.92-1.15)            |
| 43-47 mmol/mol                                                                                                                                                                                                                          | 1.05 (0.97-1.14)       | 1.05 (0.97-1.14)                     | 1.01 (0.91-1.13)            |
| 48-52 mmol/mol                                                                                                                                                                                                                          | 1.00                   | 1.00                                 | 1.00                        |
| 53-62 mmol/mol                                                                                                                                                                                                                          | 1.06 (0.98-1.14)       | 1.04 (0.97-1.12)                     | 0.99 (0.90-1.10)            |
| 63-72 mmol/mol                                                                                                                                                                                                                          | 1.03 (0.95-1.13)       | 1.04 (0.96-1.14)                     | 0.97 (0.86-1.09)            |
| 73-82 mmol/mol                                                                                                                                                                                                                          | 1.03 (0.92-1.14)       | 1.08 (0.97-1.20)                     | 1.07 (0.93-1.24)            |
| >82 mmol/mol                                                                                                                                                                                                                            | 1.04 (0.92-1.16)       | 1.15 (1.03-1.29)                     | 1.06 (0.90-1.24)            |
| *The analysis was adjusted for age, sex, smoking, country of birth, socioeconomic factors, diabetes treatment, other medications, body mass index, blood pressure, eGFR, albuminuria, and coexisting conditions (Supplemental Table S1) |                        |                                      |                             |
